# Supplementary material for: Reprogrammable meta-hologram for optical encryption
Source: PubMed Central journal article supplement (PMC7603497; doi:10.1038/s41467-020-19312-9), 2020-10-30
Supplement: 41467_2020_19312_MOESM2_ESM.pdf [file 41467_2020_19312_MOESM2_ESM.pdf]

## **Description of Additional Supplementary Files**

File Name: Supplementary Movie 1

Description: The supplementary movie 1 demonstrates a pinball game from start to the end using the metasurface by playing these frames sequentially.
